# Supplementary material for: Development of immunoassays for detecting oxyfluorfen residue in agricultural and environmental samples
Source: Royal Society of Chemistry journal article supplement (doi:10.1039/c7ra12445g), 2018-01-01
Supplement: c7ra12445g1.pdf [file c7ra12445g1.pdf]

## **Electronic Supplementary Information**

### **Development of immunoassays for detecting oxyfluorfen residue in agricultural and environmental samples**

**Enze Sheng<sup>a, b</sup>, Mei Du<sup>a, b</sup>, Jiachuan Yang<sup>a, b</sup>, Xiude Hua<sup>a, b</sup>, Minghua Wang<sup>a, b, \*</sup>**

<sup>a</sup>Department of Pesticide Science, College of Plant Protection, Nanjing Agricultural University, Nanjing 210095, P. R. China

<sup>b</sup>State & Local Joint Engineering Research Center of Green Pesticide Invention and Application, Nanjing 210095, P. R. China

\*Corresponding author. Tel.: +86 25 84395479. Fax: +86 25 84395479. E-mail address: wangmha@njau.edu.cn (M.W.)

**Table S1** Effect of methanol content, ionic strength and pH value on immunoassay

**Fig. S1** The ESI-MS spectrogram of the hapten of oxyfluorfen

**Fig. S2** The  $^1\text{H-NMR}$  spectrogram of the hapten of oxyfluorfen

**Fig. S3** The ultraviolet spectrogram of OVA, BSA and the conjugates with oxyfluorfen hapten

**Fig. S4** Matrix effect of samples on the sensitivity of the ELISA.

**Fig. S5** Matrix effect of samples on the sensitivity of the CLEIA.

**Table S1** Effect of methanol content, ionic strength and pH value on immunoassay

| Factors              | ELISA              |                  |        | CLEIA                |                  |       |       |
|----------------------|--------------------|------------------|--------|----------------------|------------------|-------|-------|
|                      | $A_{\max}/IC_{50}$ | $IC_{50}$ (mg/L) | $R^2$  | $RLU_{\max}/IC_{50}$ | $IC_{50}$ (mg/L) | $R^2$ |       |
| Methanol<br>(v/v, %) | 0                  | 2.091            | 0.531  | 0.978                | 380021           | 0.153 | 0.976 |
|                      | 10                 | 2.355            | 0.482  | 0.988                | 518317           | 0.063 | 0.985 |
|                      | 20                 | 3.457            | 0.321  | 0.976                | 489924           | 0.079 | 0.968 |
|                      | 30                 | 2.738            | 0.413  | 0.965                | 464409           | 0.083 | 0.977 |
|                      | 40                 | 1.914            | 0.594  | 0.958                | 320214           | 0.121 | 0.983 |
|                      | 50                 | 1.693            | 0.674  | 0.963                | 242680           | 0.147 | 0.984 |
| $Na^+$ (mol/L)       | 0.1                | 2.155            | 0.382  | 0.944                | 537545           | 0.066 | 0.981 |
|                      | 0.2                | 4.146            | 0.315  | 0.965                | 521735           | 0.068 | 0.972 |
|                      | 0.3                | 4.187            | 0.273  | 0.982                | 626087           | 0.057 | 0.994 |
|                      | 0.4                | 9.412            | 0.127  | 0.981                | 690320           | 0.053 | 0.985 |
|                      | 0.5                | 12.43            | 0.0894 | 0.987                | 740191           | 0.047 | 0.991 |
|                      | 0.6                | 7.854            | 0.142  | 0.973                | 695450           | 0.051 | 0.978 |
| pH value             | 4.5                | 13.3             | 0.076  | 0.954                | 844452           | 0.042 | 0.983 |
|                      | 5.5                | 16.11            | 0.069  | 0.968                | 1108757          | 0.033 | 0.982 |
|                      | 6.5                | 16.58            | 0.065  | 0.982                | 1306678          | 0.028 | 0.996 |
|                      | 7.5                | 12.34            | 0.073  | 0.988                | 1015944          | 0.036 | 0.971 |
|                      | 8.5                | 11.91            | 0.084  | 0.967                | 888097           | 0.041 | 0.984 |
|                      | 9.5                | 8.692            | 0.13   | 0.957                | 812044           | 0.045 | 0.963 |

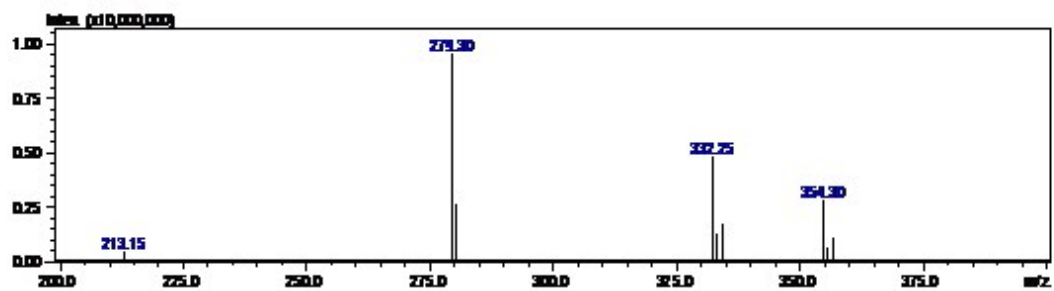

Fig. S1 The ESI-MS spectrogram of the hapten of oxyfluorfen

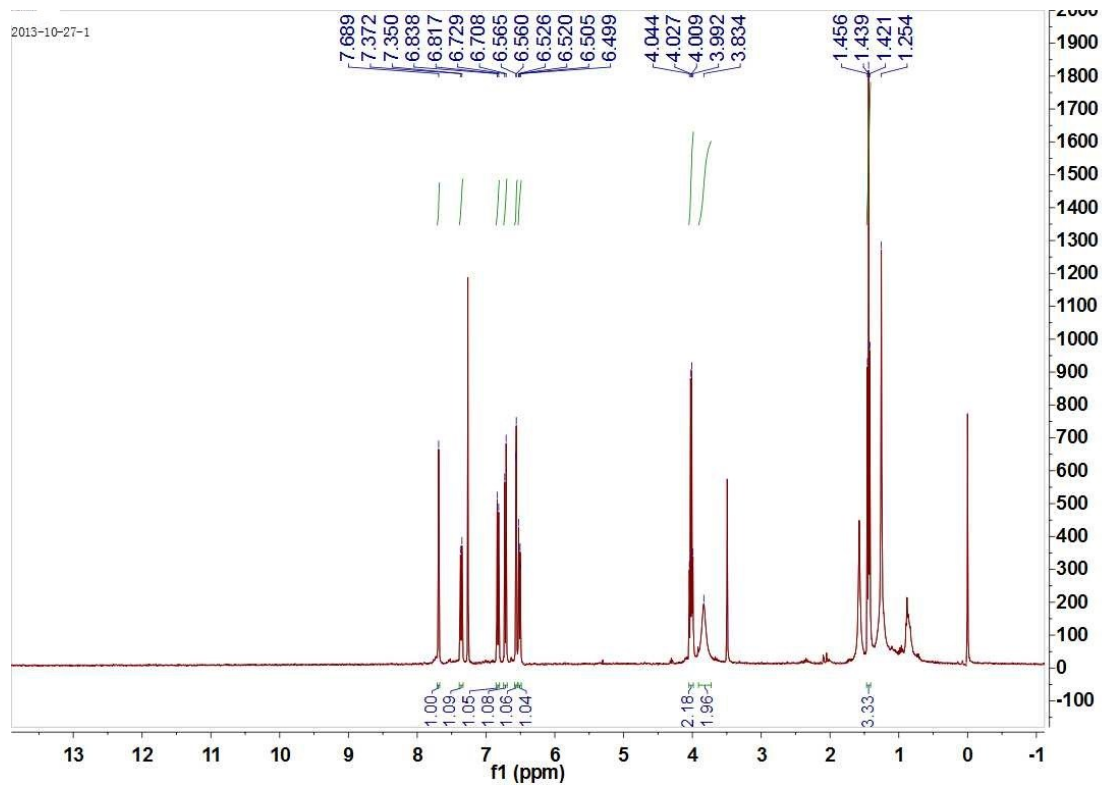

**Fig. S2** The  $^1\text{H}$ -NMR spectrogram of the hapten of oxyfluorfen

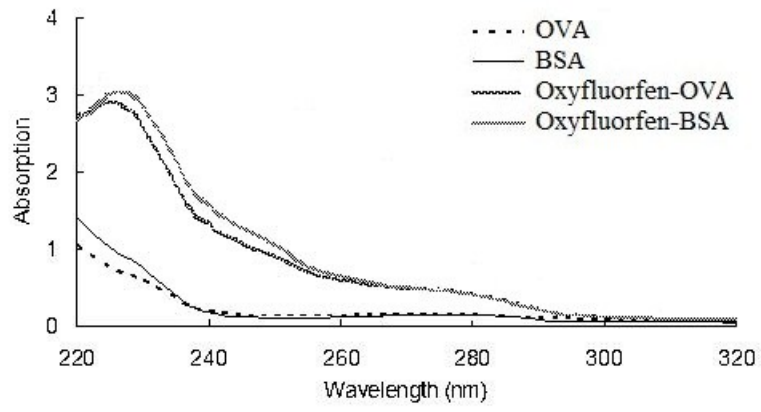

**Fig. S3** The ultraviolet spectrogram of OVA, BSA and the conjugates with oxyfluorfen hapten

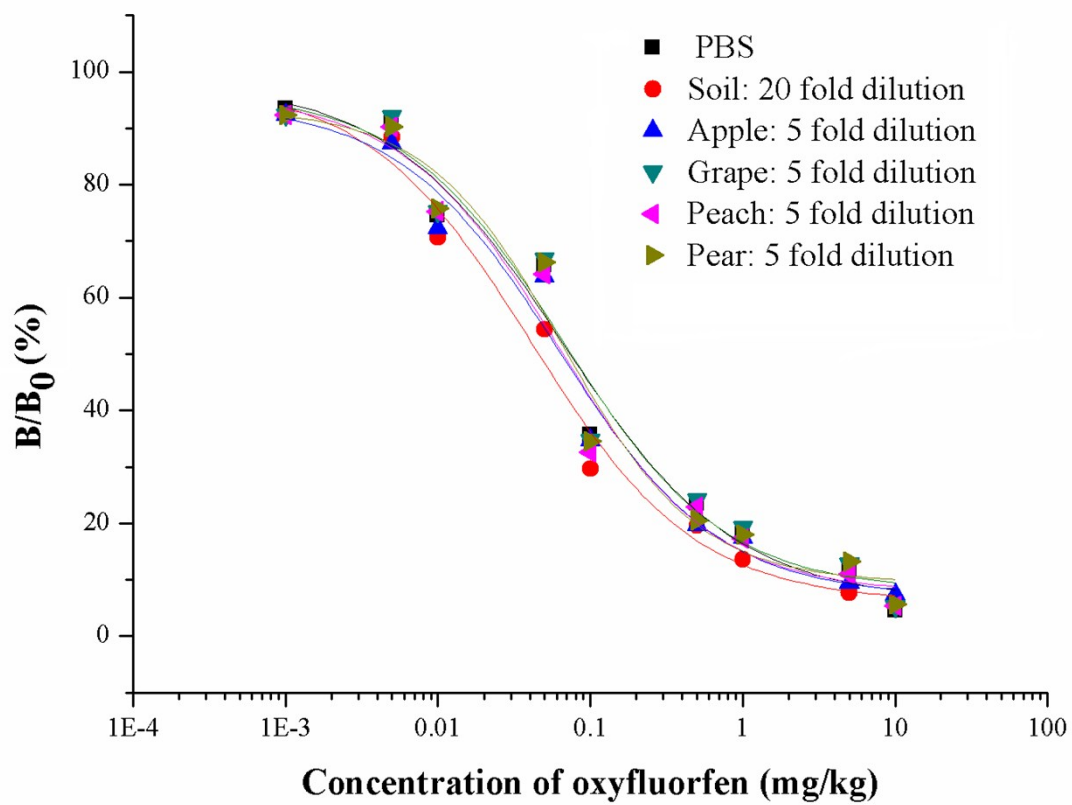

**Fig. S4** Matrix effect of samples on the sensitivity of ELISA.

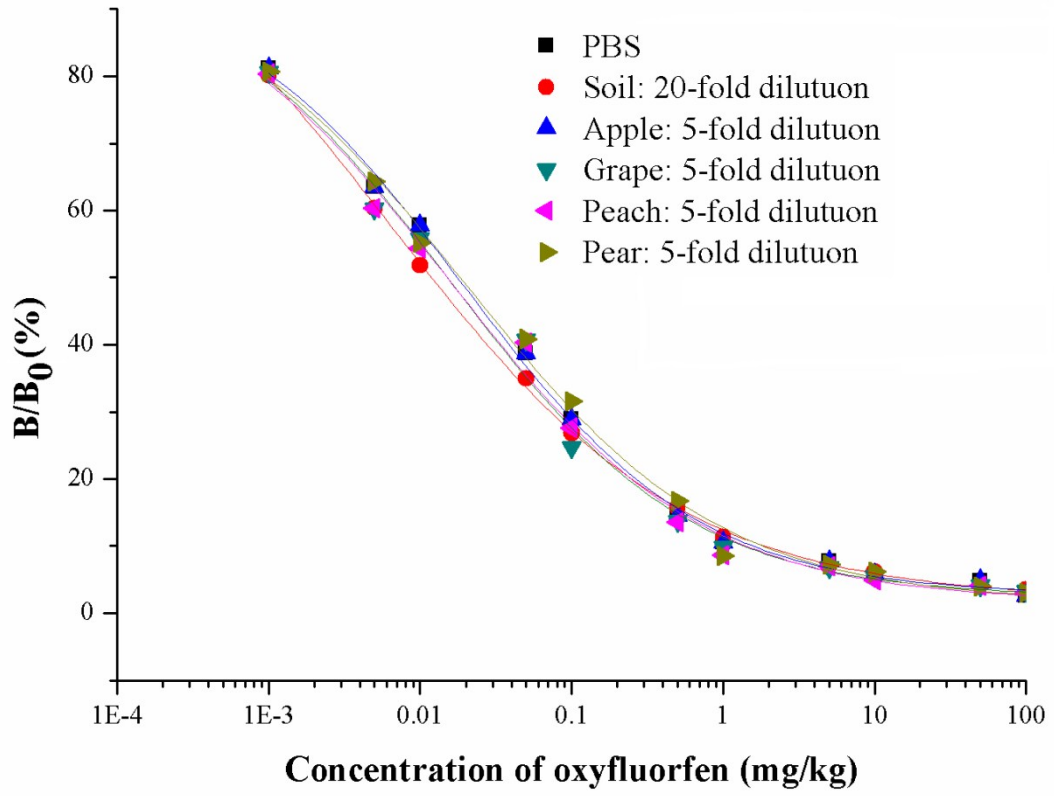

**Fig. S5** Matrix effect of samples on the sensitivity of CLEIA.
